# Supplementary material
Source: PubMed Central journal article supplement (PMC4892231)
Supplement: Supp_Table1.pdf [file Supp_Table1.pdf]

## Supplementary Data

SUPPLEMENTARY TABLE S1. GENES SORTED AND GROUPED WITHIN GENE SETS

| <i>Probe set</i>                                 | <i>Symbol</i> | <i>Name</i>                                                 | <i>Entrez ID</i> | <i>UGCluster</i> | <i>Parametric p-value</i> | <i>Fold change LUT/FOL</i> |
|--------------------------------------------------|---------------|-------------------------------------------------------------|------------------|------------------|---------------------------|----------------------------|
| <b>Bosco interferon-induced antiviral module</b> |               |                                                             |                  |                  |                           |                            |
| 205569_at                                        | LAMP3         | Lysosomal-associated membrane protein 3                     | 27074            | Hs.518448        | .0020369                  | 1.37                       |
| 228617_at                                        | XAF1          | XIAP-associated factor 1                                    | 54739            | Hs.441975        | .0042283                  | 1.43                       |
| 206133_at                                        | XAF1          | XIAP-associated factor 1                                    | 54739            | Hs.441975        | .0050929                  | 1.32                       |
| 206637_at                                        | P2RY14        | Purinergic receptor P2Y, G-protein-coupled, 14              | 9934             | Hs.2465          | .0055399                  | 1.30                       |
| 242234_at                                        | XAF1          | XIAP-associated factor 1                                    | 54739            | Hs.441975        | .0062704                  | 1.23                       |
| 242625_at                                        | RSAD2         | Radical S-adenosyl methionine domain containing 2           | 91543            | Hs.17518         | .0104241                  | 1.32                       |
| 204439_at                                        | IFI44L        | Interferon-induced protein 44-like                          | 10964            | Hs.744918        | .0108208                  | 1.37                       |
| 230550_at                                        | MS4A6A        | Membrane-spanning 4-domains, subfamily A, member 6A         | 64231            | Hs.523702        | .0127977                  | 1.22                       |
| 229450_at                                        | IFIT3         | Interferon-induced protein with tetratricopeptide repeats 3 | 3437             | Hs.47338         | .0131265                  | 1.30                       |
| 218986_s_at                                      | DDX60         | DEAD (Asp-Glu-Ala-Asp) box polypeptide 60                   | 55601            | Hs.591710        | .0152897                  | 1.33                       |
| 214059_at                                        | IFI44         | Interferon-induced protein 44                               | 10561            | Hs.82316         | .0160178                  | 1.27                       |
| 225344_at                                        | NCOA7         | Nuclear receptor coactivator 7                              | 135112           | Hs.171426        | .0167378                  | 1.22                       |
| 230036_at                                        | SAMD9L        | Sterile alpha motif domain containing 9-like                | 219285           | Hs.489118        | .0189228                  | 1.18                       |
| 226603_at                                        | SAMD9L        | sterile alpha motif domain containing 9-like                | 219285           | Hs.489118        | .0317858                  | 1.19                       |
| 214453_s_at                                      | IFI44         | Interferon-induced protein 44                               | 10561            | Hs.82316         | .0332761                  | 1.25                       |
| 203153_at                                        | IFIT1         | Interferon-induced protein with tetratricopeptide repeats 1 | 3434             | Hs.20315         | .0679188                  | 1.18                       |
| 213293_s_at                                      | TRIM22        | Tripartite motif containing 22                              | 10346            | Hs.501778        | .0905359                  | 1.14                       |
| 204415_at                                        | IFI6          | Interferon, alpha-inducible protein 6                       | 2537             | Hs.523847        | .2205442                  | 1.12                       |
| 210559_s_at                                      | CDK1          | Cyclin-dependent kinase 1                                   | 983              | Hs.732435        | .4019324                  | 1.06                       |
| 235175_at                                        | GBP4          | Guanylate-binding protein 4                                 | 115361           | Hs.409925        | .515013                   | 1.05                       |
| 209267_s_at                                      | SLC39A8       | Solute carrier family 39 (zinc transporter), member 8       | 64116            | Hs.288034        | .8228195                  | 0.98                       |
| 216598_s_at                                      | CCL2          | Chemokine (C-C motif) ligand 2                              | 6347             | Hs.303649        | .8616131                  | 1.02                       |
| <b>Browne interferon-responsive genes</b>        |               |                                                             |                  |                  |                           |                            |
| 228617_at                                        | XAF1          | XIAP-associated factor 1                                    | 54739            | Hs.441975        | .0042283                  | 1.43                       |
| 206133_at                                        | XAF1          | XIAP-associated factor 1                                    | 54739            | Hs.441975        | .0050929                  | 1.32                       |
| 242234_at                                        | XAF1          | XIAP-associated factor 1                                    | 54739            | Hs.441975        | .0062704                  | 1.23                       |
| 205483_s_at                                      | ISG15         | ISG15 ubiquitin-like modifier                               | 9636             | Hs.458485        | .0076164                  | 1.32                       |
| 242625_at                                        | RSAD2         | Radical S-adenosyl methionine domain containing 2           | 91543            | Hs.17518         | .0104241                  | 1.32                       |
| 204439_at                                        | IFI44L        | Interferon-induced protein 44-like                          | 10964            | Hs.744918        | .0108208                  | 1.37                       |
| 229450_at                                        | IFIT3         | Interferon-induced protein with tetratricopeptide repeats 3 | 3437             | Hs.47338         | .0131265                  | 1.30                       |
| 231577_s_at                                      | GBP1          | Guanylate-binding protein 1, interferon inducible           | 2633             | Hs.62661         | .0142057                  | 1.27                       |
| 217497_at                                        | TYMP          | Thymidine phosphorylase                                     | 1890             | Hs.180903        | .0143146                  | 1.23                       |
| 214059_at                                        | IFI44         | Interferon-induced protein 44                               | 10561            | Hs.82316         | .0160178                  | 1.27                       |
| 202270_at                                        | GBP1          | Guanylate-binding protein 1, interferon inducible           | 2633             | Hs.62661         | .0195017                  | 1.25                       |
| 209969_s_at                                      | STAT1         | Signal transducer and activator of transcription 1, 91 kDa  | 6772             | Hs.642990        | .0309462                  | 1.22                       |
| 214453_s_at                                      | IFI44         | Interferon-induced protein 44                               | 10561            | Hs.82316         | .0332761                  | 1.25                       |
| 211122_s_at                                      | CXCL11        | Chemokine (C-X-C motif) ligand 11                           | 6373             | Hs.632592        | .0397639                  | 1.69                       |
| 202411_at                                        | IFI27         | Interferon, alpha-inducible protein 27                      | 3429             | Hs.532634        | .0430386                  | 1.30                       |

(continued)

SUPPLEMENTARY TABLE S1. (CONTINUED)

| <i>Probe set</i> | <i>Symbol</i> | <i>Name</i>                                                 | <i>Entrez ID</i> | <i>UGCluster</i> | <i>Parametric p-value</i> | <i>Fold change LUT/FOL</i> |
|------------------|---------------|-------------------------------------------------------------|------------------|------------------|---------------------------|----------------------------|
| 202269_x_at      | GBP1          | Guanylate-binding protein 1, interferon inducible           | 2633             | Hs.62661         | .0480743                  | 1.19                       |
| 210163_at        | CXCL11        | Chemokine (C-X-C motif) ligand 11                           | 6373             | Hs.632592        | .0500785                  | 1.64                       |
| 213293_s_at      | TRIM22        | Tripartite motif containing 22                              | 10346            | Hs.501778        | .0905359                  | 1.14                       |
| 205992_s_at      | IL-15         | Interleukin 15                                              | 3600             | Hs.168132        | .099269                   | 1.14                       |
| 226757_at        | IFIT2         | Interferon-induced protein with tetratricopeptide repeats 2 | 3433             | Hs.437609        | .1759377                  | 1.15                       |
| 202869_at        | OAS1          | 2'-5'-oligoadenylate synthetase 1, 40/46 kDa                | 4938             | Hs.524760        | .1894992                  | 1.12                       |
| 204533_at        | CXCL10        | Chemokine (C-X-C motif) ligand 10                           | 3627             | Hs.632586        | .1993298                  | 1.22                       |
| 204415_at        | IFI6          | Interferon, alpha-inducible protein 6                       | 2537             | Hs.523847        | .2205442                  | 1.12                       |
| 242907_at        | GBP2          | Guanylate-binding protein 2, interferon inducible           | 2634             | Hs.386567        | .2578696                  | 1.09                       |
| 215342_s_at      | RABGAP1L      | RAB GTPase-activating protein 1-like                        | 9910             | Hs.585378        | .616329                   | 1.05                       |
| 201641_at        | BST2          | Bone marrow stromal cell antigen 2                          | 684              | Hs.118110        | .6411796                  | 1.04                       |

FOL, follicular; LUT, luteal.
